## Heg.IA: An intelligent system to support diagnosis of Covid-19 based on blood tests

Valter Augusto de Freitas Barbosa<sup>a</sup>, Juliana Carneiro Gomes<sup>b</sup>,  
Maíra Araújo de Santana<sup>b</sup>, Jeniffer Emidio de Almeida Albuquerque<sup>d</sup>,  
Rodrigo Gomes de Souza<sup>c</sup>, Ricardo Emmanuel de Souza<sup>d</sup>,  
Wellington Pinheiro dos Santos<sup>d</sup>

<sup>a</sup>*Department of Mechanical Engineering, Federal University of Pernambuco, Recife, Brazil*

<sup>b</sup>*Politechnique School of the University of Pernambuco, Recife, Brazil*

<sup>c</sup>*Centre for Informatics, Federal University of Pernambuco, Recife, Brazil*

<sup>d</sup>*Department of Biomedical Engineering, Federal University of Pernambuco, Recife, Brazil*

---

### Abstract

A new kind of coronavirus, the SARS-Cov2, started the biggest pandemic of the century. It has already killed more than 250,000 people. Because of this, it is necessary quick and precise diagnosis test. The current gold standard is the RT-PCR with DNA sequencing and identification, but its results takes too long to be available. Tests base on IgM/IgG antibodies have been used, but their sensitivity and specificity may be very low. Many studies have been demonstrating the Covid-19 impact in hematological parameters. This work proposes an intelligent system to support Covid-19 diagnosis based on blood testing. We tested several machine learning methods, and we achieved high classification performance:  $95.159\% \pm 0.693$  of overall accuracy, kappa index of  $0.903 \pm 0.014$ , sensitivity of  $0.968 \pm 0.007$ , precision of  $0.938 \pm 0.010$  and specificity of  $0.936 \pm 0.011$ . These results were achieved using classical and low computational cost classifiers, with Bayes Network being the best of them. In addition, only 24 blood tests were needed. This points to the possibility of a new rapid test with low cost. The desktop version of the system is fully functional and available for free use.

---

\*Wellington Pinheiro dos Santos

*Email address:* [wellington.santos@ufpe.br](mailto:wellington.santos@ufpe.br) (Wellington Pinheiro dos Santos)

*Preprint submitted to Elsevier*

*May 15, 2020*

*Keywords:* Covid-19, Blood tests, Software-based rapid test, Computer-aided diagnosis, Machine Learning for diagnosis, Covid-19 rapid test

---

## 1. Introduction

A new kind of coronavirus started the biggest pandemic of the century. This virus received the name SARS-Cov2 to be related to severe acute respiratory syndrome coronavirus (Lin et al., 2020; Okba et al., 2020), one of the most  
5 dangerous consequences of Coronavirus Disease 19 (Covid-19). The clinical symptoms of Covid-19 patients include fever, cough, sore throat and some cases even gastrointestinal infection symptoms (Guo et al., 2020b). In the most severe cases it can lead to shortness of breath and death.

SARS-Cov2 probable origin is from a pangolin virus called Pangolin-CoV:  
10 they are 91.02% identical in whole-genome level (Zhang et al., 2020b). The first record of the SARS-Cov2 is from Wuhan, China in later December 2019. In May 2020 it have already spread to 215 countries in the world (WHO, 2020). The virus has a stronger human-to-human transmission capacity. Until May 2020 more than 3 people million were infected and more than 250 thousands of  
15 deaths (WHO, 2020). In this case, it is necessary quick and precise diagnosis tests (Beeching et al., 2020). The ground-truth test in Covid-19 diagnosis is the Reverse Transcription Polymerase Chain Reaction (RT-PCR) with DNA sequencing and identification (Döhla et al., 2020). However its result needs several hours to be ready (Döhla et al., 2020).

20 Tests based on IgM/IgG antibodies delivers results quickly, however they are nonspecific for Covid-19, and may have very low sensitivity and specificity (Patel et al., 2020; Burog et al., 2020; Egner et al., 2020; Döhla et al., 2020; Tang et al., 2020b). IgM/IgG tests do not detect the SARS-Cov2 presence directly, indeed they detect the serological evidence of recent infection. According to Li  
25 et al. (2020) positive response could be from of antibodies of other coronaviruses and flu viruses. The use of IgM/IgG rapid test kits as definitive diagnosis of Covid-19 in currently symptomatic patients is not recommended (Burog et al.,

2020) because tests made in samples collected in the first week of illness have only 18.8% of sensitivity and 77.8% of specificity (Liu et al., 2020b). Döhla et al.  
30 (2020) compared the results of IgM/IgG with reverse transcription polymerase chain reaction (RT-PCR) in 59 patients and IgM/IgG tests obtained 36.4% of sensitivity and 88.9% of specificity.

IgG/IgM tests performed during the second week of the disease have 100% of sensitivity and 50% of specificity (Liu et al., 2020b). That means when the  
35 viral charge is high IgG/IgM tests reach high sensitivities and specificities. But in that cases the disease is in advanced levels (Guo et al., 2020a; Hoffman et al., 2020).

Many works have been demonstrating the Covid-19 impact in cardiovascular system and hematological characteristics (Fan et al., 2020; Tan et al., 2020; Gao  
40 et al., 2020; Liu et al., 2020a; Gunčar et al., 2018; Zheng et al., 2020). According to Turner et al. (2004) the coronaviruses, like SARS-Cov and SARS-Cov2, have as functional receptor the zinc metalloproteinase angiotensin-converting enzyme 2 (ACE2), an enzyme presents in cell membranes of arteries, heart, lungs and other organs. ACE2 is implicated in heart function, hypertension and diabetes.  
45 Considering this fact, Zheng et al. (2020) pointed that Middle East respiratory syndrome-related coronavirus (MERS-CoV) and severe acute respiratory syndrome coronavirus (SARS-Cov) can cause acute myocarditis and heart failure. Some of the coronaviruses impacts in cardiovascular system are the increase in blood pressure, and increase in troponin I (hs-cTnI) levels (Zheng et al., 2020).  
50 Others works found that patients with Covid-19 can developed lymphopenia (low level of lymphocytes in the blood) (Fan et al., 2020; Tan et al., 2020; Liu et al., 2020a), leukopenia (few white blood cells). They can also have decrease in their hemoglobin levels, Absolute Lymphocyte Count (ALC) and Absolute Monocyte Count (AMC) (Fan et al., 2020). Patients that developed severe  
55 forms of the disease have significantly higher levels of hematological characteristics as Interleukin-6, D-dimer than patients that developed moderate form of the Covid-19 (Gao et al., 2020). Therefore, as Covid-19 is a disease that affects the blood, hematological exams can be used in diagnosis tests.

In the other hand, machine learning techniques have been used to diagnosis  
60 diseases by analyzing hematological parameters (Tanner et al., 2008; Luo et al.,  
2016; Gunčar et al., 2018). Machine learning is a subarea of the Artificial  
Intelligence in Computer Science. One of the mean goals of machine learning  
techniques is to perform pattern detection in databases.

In this way, it is necessary the development of one diagnosis support system  
65 that provide a quick result and with high sensibility even if the samples were  
be taken in early stages of the disease. In this context, blood tests utilization  
have some advantages. First, they are commonly used during medical screening.  
Besides that blood tests do not take too long to be ready and they have low  
price compared with other diagnosis methods.

70 In this work, we propose a diagnosis support system of the Covid-19 based  
in machine learning techniques. This pioneering system uses blood tests to  
diagnose Covid-19. We used the database provided by Hospital Israelita Albert  
Einstein located in São Paulo, Brazil. The database contains data from 5644  
patients among them 559 patients were diagnosis with Covid-19 by using the  
75 gold standard method, the reverse transcription polymerase chain reaction (RT-  
PCR) (Kaggle, 2020). More than one hundred laboratory exams are available in  
the database like blood counts and urine test. Thus, aiming to provide a quick  
diagnosis we performed the reduction of exams by choosing which tests are  
most relevant to the diagnosis. Firstly we made it by using attribute selection  
80 algorithms based on Evolutionary Search (ES) (Liang et al., 2000; Kim et al.,  
2000) and Particle Swarm Optimization (PSO) (Kennedy & Eberhart, 1995; Poli  
et al., 2007; Wang et al., 2007). In the following, we made a hand reduction  
aiming to obtain the lower test price, small period of time required to the  
exams to be ready and the lower amount of blood samples needed. Finally, we  
85 obtained a database with 24 blood tests. According to empirical information<sup>1</sup>,  
these exams may have turnaround time of 30 to 60 minutes in an emergency

---

<sup>1</sup>According to the Brazilian Society of Clinical Analysis, there is no reference document to  
establish standard turnaround times for the exams described above.

context. So our proposal can be used as a rapid test.

We performed several experiments with different machine learning techniques as Multilayer Perceptron (Rosenblatt, 1958; Haykin, 2001), Support  
90 Vector Machine (Boser et al., 1992; Cortes & Vapnik, 1995), Random Trees, Random Forest (Breiman, 2001; Geurts et al., 2006), Bayesian networks and Naive Bayes (Cheng & Greiner, 2001; Haykin, 2001) and evaluated their results. Experiments show that Bayesian networks has superior performance with respect to other techniques. In order to choose this method, we considered six  
95 parameters: accuracy, sensibility, specificity, precision, recall, and kappa index.

This paper is organized as follows: Section 2 discuss some related works that found that Covid-19 can affect hematological characteristics. Section 3 presents the Kaggle database and reviews the theoretical machine learning methods concepts necessary to understand this work. It is also described how we manipulated Kaggle database and how we performed the experiments. Section 4 shows  
100 and analyzes the experimental results and the resulting desktop application we developed. We finalized the paper in section 6 with the conclusions.

## 2. Related works

Several studies have shown the importance of blood tests for diagnosis and  
105 indicative of the degree of severity of Covid-19. Fan et al. (2020) analyzed hematological indexes of 69 patients with Covid-19. All of them were treated at the National Center for Infectious Diseases (NCID), located in Singapore. Among these patients, 65 underwent complete blood count (CBC) on the day of admission. In addition, demographic information such as age, gender, ethnicity  
110 and location were made available for this research. 13.4% of patients needed intensive care unit (ICU) care, especially the elderly. During the first exams, 19 patients had leukopenia (few white blood cells) and 24 had lymphopenia (low level of lymphocytes in the blood), with 5 cases classified as severe (Absolute Lymphocyte Count (ALC)  $< 0.5 \times 10^9/L$ ). The study also pointed out that  
115 patients who needed to be admitted to the ICU had lower ALC and a higher

rate of Lactate Dehydrogenase (LDH). These data indicated that monitoring these parameters can help to identify patients who need assistance in the ICU. Also considering 9 patients who were in the ICU, the authors observed that the patients had a significant decrease in their hemoglobin levels, ALC and Absolute  
120 Monocyte Count (AMC) levels compared to the non-ICU group. ICU patients also tend to neutrophilia. The platelet count did not prove to be a factor for discrimination between the type of hospitalization.

Tan et al. (2020) also looked at complete blood count of patients (cured ones and also 12 patients who died from Covid-19). The authors sought to  
125 obtain key indicators of disease progression, as a way of supporting future clinical management decisions. In the case of patients who died, blood tests were monitored continuously throughout the treatment process. As in the previous study, the authors observed lymphopenia in this group. Based on this, the study then outlined a model (Time-LYM% model, TLM) for classifying disease severity and predicting prognosis. Thus, the blood lymphocyte percentage  
130 (LYM%) was divided into two cases, considering the first 10-12 days of symptoms:  $LYM\% > 20\%$  are classified as moderate cases and with a high chance of recovery.  $LYM\% < 20\%$  are classified as severe cases. In a second exam, 17-18 days after the first symptoms, patients with  $LYM\% > 20\%$  are recovering, patients with  $5 < LYM\% < 20\%$  are in danger, and  $LYM\% < 5\%$  are in critical  
135 condition. In order to validate the model, the authors evaluated 90 patients with Covid-19. The consistency between Guideline and TLM-based disease classification was verified using kappa statistic ( $Kappa = 0.48$ ). These results indicate that probably LYM% should be used together with other parameters for a better  
140 evaluation of Covid-19.

Gao et al. (2020) observed hematological characteristics of 43 patients at Fuyang Second People's Hospital. The patients had a diagnosis confirmed by the Covid-19 ground truth test, the fluorescent reverse transcription-polymerase chain reaction (RT-PCR). They were divided into two groups: the moderate  
145 group with 28 patients, and the severe group with 15 patients. The groups have no significant difference in age and sex. The blood tests observed were: Routine

blood tests (white blood cell [WBC] count, lymphocyte count [LYM], mononuclear count [MONO], neutrophils count [NEU]) were performed on the blood samples. Blood biochemistry parameters (aspartate aminotransferase [AST],  
150 alanine aminotransferase [ALT], glucose [GLU], urea, creatinine [Cr], cystatin [Cys-c], uric acid [UA], and C-reactive protein [CRP]); Coagulation functions (the D-dimer [d-D], thrombin time [TT], prothrombin time [PT], fibrinogen [FIB], activated partial thromboplastin time [APTT]); rocalcitonin (PCT); and Interleukin-6 (IL-6). Using statistical tests, the study noted that the levels of  
155 GLU, CRP, IL-6, TT, FIB, and d-D were significantly higher in the severe group than in the mild group. Performing this analysis with ROC curves, the authors pointed out that the best indicators for predicting severity were IL-6 and d-D combined, with AUC of 0.840. The combination also achieved specificity of 96.4% and sensitivity of 93.3%, using tandem and parallel testing, respectively.  
160 These results indicate that patients with severe conditions would have abnormal coagulation.

Liu et al. (2020a) reported that lymphopenia and inflammatory cytokine storm are abnormalities commonly found in other infections caused by coronavirus, such as SARS-Cov and MERS-Cov. With that in mind, they studied 40  
165 patients diagnosed with Covid-19 confirmed by throat-swab specimens analyzed with RT-PCR. The patients were treated at Wuhan Union Hospital in January, 2020. The information provided was: epidemiological, demographic, clinical manifestations and laboratory tests. Similar to the previous study, patients were divided into two groups: mild patients, with symptoms such as epidemi-  
170 ological history, fever or respiratory symptoms, and abnormalities in imaging tests; the second group with severe patients, patients should additionally have symptoms such as shortness of breath, oxygen saturation < 93%, respiratory > 30 times/min, or PaO<sub>2</sub>/FiO<sub>2</sub> < 300 mmHg. 27 patients were classified in the first group, while 13 were classified in the second. The student reported  
175 that levels of fibrinogen, D-dimer, total bilirubin, aspartate transaminase, alanine transaminase, lactate dehydrogenase, creatine kinase, C-reactive protein (CRP), ferritin and serum amyloid A protein were significantly higher in the se-

vere group. Furthermore, most severe patients presented lymphopenia, that can be related to the significantly decreased absolute counts of T cells, especially  
180 CD8+ T cells, while white blood cells and neutrophils counts were higher.

These studies have pointed out that hematological parameters can be indicators of the risk factors and degree of severity of Covid-19. The identification of these parameters can be essential to facilitate clinical care for each group of patients. In this sense, the development of intelligent systems based on blood  
185 tests is useful. Faced with the pandemic scenario, in which most hospitals are full, decision support systems can facilitate clinical management. Thus, it can increase the assertiveness in the treatment for each case and, consequently, the number of lives saved.

Gunčar et al. (2018) proposed a system based on machine learning for analyzing blood tests and predicting hematological diseases. The models were  
190 developed with data from the University Medical Center of Ljubljana, which were collected between the years 2005 and 2015. In this case, 43 diseases and 181 parameters or attributes were selected to generate a first model (SBA-HEM181). In addition to it, a second model with 61 parameters was also developed (SBA-HEM061). The selection of the smaller group was made according  
195 to the frequency of use. Regarding the missing values (about 75%), the authors filled in with median values for each attribute. For the development of the intelligent system, classic classifiers such as Support Vector Machines, Naive Bayes and Random Forest were tested, with the latter being chosen. The simulations were repeated 10 times using 10-fold cross validation. Finally, the models  
200 SBA-HEM181 and SBA-HEM061 reached an accuracy of 57% considering all the diseases chosen. By restricting the prediction to five classes, the systems achieved an accuracy of 88% and 86%, respectively. These results pointed to the possibility of detecting diseases through blood tests using classic classifiers.



### 205 3. Materials and methods

In this work we explore, evaluate and analyze the performance of various machine learning techniques to predict Covid-19 diagnosis based on different clinical exams configurations. In addition, we also propose an intelligent system in a desktop application format.

#### 210 3.1. Proposed method

In this work we propose a support system for Covid-19 detection using clinics blood exams called Heg.IA. Heg.IA is a smart system pioneered in the rapid detection of Covid-19 through blood tests. The basic operation of this system is: in emergency situations, the medical team should order some blood exams  
215 of patients that have characteristic symptoms of Covid-19; with the results in hands the healthcare professional could insert them in a desktop system. In the following, the system will inform whether the patient is infected with Covid-19 or not. The result will be presented with the respectively classification probabilities, helping physicians to making their final decision. Figure 1 shows  
220 a general schematic of the solution.

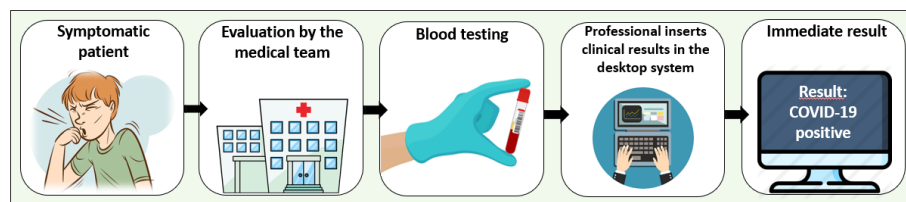

Figure 1: General proposal to diagnostic support system for the detection of Covid-19. Patients with symptoms of Covid-19 should go to health centers. The medical team must ask blood tests. Then, the results can be entered into the Heg.IA system, which will indicate if the patients is infected with SARS-Cov2.

#### 3.2. Database

For the development of this project, we used the database provided by Hospital Israelita Albert Einstein located in São Paulo, Brazil. The database was

made available in the competition format (Kaggle, 2020). The database contains the results of more than one hundred laboratory exams, such as blood count, tests for the presence of viruses such as influenza A, and urine tests, of 5644 patients. Among these patients, 559 of them are infected with SARS-Cov2. The Covid-19 diagnosis were made with reverse transcription polymerase chain reaction (RT-PCR) with DNA sequencing and using additional laboratory tests during a visit to the hospital (Kaggle, 2020). The clinical data provided in the data were normalized to have mean of zero and standard deviation one (Kaggle, 2020).

### 3.3. Database Pre-processing

In order for the data provided in the database to be used as input parameters for a machine learning method, it was necessary to assign integer numeric values to the columns containing categorical data. These columns have results of exams for detecting whether a pathogen is present or not or the appearance of patient's urine, for example. Besides that, considering that 90,1% of data is from healthy patients it is reasonable to assume that missing values are within the normal range.

In this way, for the parameters about the presence of pathogens it was assigned the value zero (0) for pathogens' absence and one (1) for pathogens' presence. Thus, for the attribute with SARS-Cov2 exam result, which gives the information whether the patient has Covid-19 or not, it was assigned the value 0 for cells marked as negative and 1 for cells with positive result. Following this procedure, the attributes Respiratory Syncytial Virus, Influenza A, Influenza B, Parainfluenza 1, Coronavirus NL63, Rhinovirus/ Enterovirus, Mycoplasma pneumoniae, Coronavirus HKU1, Parainfluenza 3; Chlamydomphila pneumoniae, Adenovirus, Parainfluenza 4, Coronavirus 229E, Coronavirus OC43, Influenza A H1N1 2009, Bordetella pertussis, Metapneumovirus, Parainfluenza 2, Influenza B evaluated with rapid test, Influenza A evaluated with rapid test, and Strepto A, it was assigned the value 0 for the not detected cases and 1 for abnormalities detected, and the value 2 was used for missing values.

The changes made to the attributes pertaining to urine tests followed the  
255 same pattern of the pathological examinations. Thus, for the attributes Urine-  
Esterase, Urine-Hemoglobin, Urine-Bile pigments, Urine-Ketone Bodies, Urine-  
Protein, Urine-Hyaline cylinders, Urine-Granular cylinders and Urine-Yeasts  
it was put on 0 for absent cases and missing values and the value 1 for the  
presence. In Urine Aspect column it was adopted 0 for clear and missing values,  
260 1 for lightly cloudy class and 2 for cloudy class. In Urine-Crystals the absense  
category and missing values were replaced by 0, Amorphous Urate replaced by  
1, Calcium Oxalate replaced by 2. The light yellow category and missing values  
from Urine-Color was assigned as 0, yellow as 1 and orange as 2. Whereas "Urine  
– Urobilinogen the results classified as normal were replaced by 1, not done or  
265 missing value by 0. Lastly the values in Urine – Leukocytes less than 10000 were  
replaced by 0 and the values greater or equal than 10000 by 1. Considering that  
the database is normalized with mean of zero the missing values from columns  
containing numeric values were filled by 0. In other words, the missing values  
were filled with the mean. This is due to our presumption that most patients in  
270 the database set are healthy. So we assumed that the mean is within in normal  
range.

Besides that, the low number of patients with Covid-19 in the database might  
bias the classification to the majority class (healthy patients class). In view of  
that, we performed a synthetic balancing by using Synthetic Minority Over-  
275 sampling TEchnique (SMOTE). It is an oversampling technique for generating  
synthetic samples from the minority class. SMOTE uses linear combinations of  
two similar samples to construct new data (Blagus & Lusa, 2013).

After changing categorical data and handle with missing values it was possible  
to build in up a database used to predict Covid-19 diagnosis.

#### 280 3.4. Attribute Selection

The database constructed during the pre-processing was submitted to feature  
selection using Particle Swarm Optimization (PSO) (Kennedy & Eberhart, 1995;  
Poli et al., 2007; Wang et al., 2007) and Evolutionary Search (ES) (Liang et al.,

2000; Kim et al., 2000). Both using 20 individuals and 500 iterations. The goal of  
285 the attribute selection is to find which exams are more relevant for classification  
tasks and also to reduce the number of required exams for diagnostic support  
and consequently its price. Thus the solution can be extend to public healthcare  
center with low costs.

We chose to use PSO and ES algorithms, since they are well established  
290 methods for feature selection. Both feature selection methods are widely used  
due to their global search ability. PSO algorithm uses a population of randomly  
generated particles. In this approach, each particle corresponds to randomly  
generated solution and have an associated velocity and position. ES, on the  
other hand, is a version of genetic algorithms, which emulates Darwinism prin-  
295 ciple of natural selection and genetic reproduction. Thus, this method uses the  
evolution principles to assess the best solution to a given problem.

The feature selection implementation resulted three databases in total: The  
original database with 108 attributes: SARS-Cov2 (PSO) and SARS-Cov2 (ES)  
with 63 and 62 attributes, respectively. The acronyms PSO and ES in database'  
300 names indicate that the database was obtained by attribute selection using PSO  
and ES respectively.

After selecting attributes with PSO and ES, a last selection was made man-  
ually. This aims to reduce the number of tests required for the diagnosis and  
speeding up the process. Consequently, we have also achieved a reduction in  
305 exam costs. The selection was made based on the prices of each of the listed  
exams. They were removed one by one, and the performance of the classifica-  
tion was evaluated at each step. Thus, it was possible to significantly decrease  
the number of attributes, with minor impacts in the performance of the system.  
Finally, a fourth database was generated with only 24 attributes. The base was  
310 named SARS-CoV2 (CheapExams). This complete process is described in the  
diagram in Figure 2.

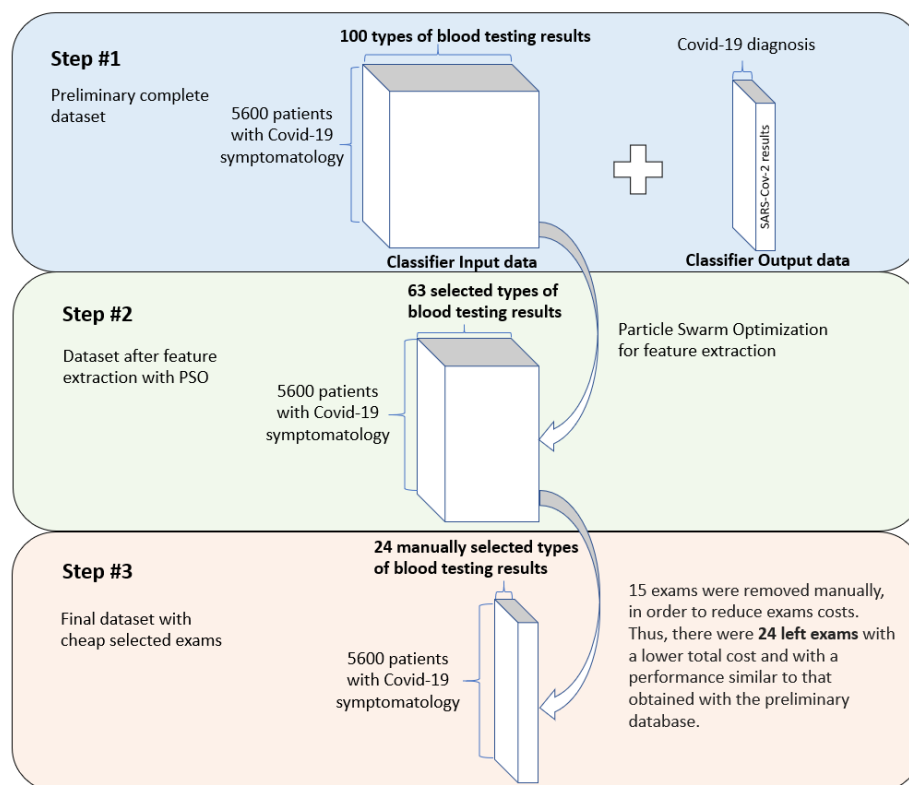

Figure 2: Description of feature extraction process: PSO and ES algorithms were applied to the original database, resulting in 63 attributes. In the following, 24 attributes were selected manually with a lower total cost and with a performance similar to the preliminary database.

### 3.5. Classification

#### 3.5.1. Multilayer Perceptron

In 1958, Frank Rosenblatt (Rosenblatt, 1958) proposed the perceptron model  
315 for supervised learning. Rosenblatt was psychologist and one of the pioneers in  
the concept of artificial neural networks. His perceptron model is the simplest  
form of neural network used for binary classifications of linearly separable pat-  
terns. It consists of a single neuron with adjustable synaptic weights and a bias  
(Haykin, 2001).

320 Multilayer Perceptron (MLP) is a generalization of the single layer percep-

tron. It consists of a feed-forward network with an input layer, hidden layers and one output layer. The addition of hidden layers allows to the network the ability to classify more complex problems than single layer perceptron such as image classification (Lerner et al., 1994; Phung et al., 2005; Barbosa et al., 2020).

325 MLP training is performed in a supervised way, through the error correction learning rule. This rule adjusts the synaptic weights in a way that the network output becomes closer to the expected output. This method usually uses an error backpropagation algorithm to adjust these weights. Based on a gradient descent, backpropagation proceeds in two phases: propagation and backprop-  
330 agation. In the propagation phase, an output is obtained for a given input pattern. In backpropagation phase, an error is calculate using the desired output and the output obtained in the previous phase. Then, the error is used to update the connection weights. Thus backpropagation aims to iteratively minimize the error between the network output obtained and the desired output  
335 (Haykin, 2001).

MLPs and other artificial neural networks architectures like Extreme Learning Machines have been commonly used in support diagnosis applications, e.g. breast cancer diagnosis over breast thermography (de Vasconcelos et al., 2018; Pereira et al., 2020b; Santana et al., 2020; Pereira et al., 2020a,c; Santana et al.,  
340 2018; Rodrigues et al., 2019), mammography images (de Lima et al., 2016; Lima et al., 2015; de Lima et al., 2014; Silva et al., 2020; Cordeiro et al., 2017, 2016; de Lima et al., 2014; Cruz et al., 2018), and multiple sclerosis diagnosis support (Commowick et al., 2018).

### 3.5.2. *Support Vector Machine*

345 Created by Vladimir Vapnik and Alexey Chervonenkis (Boser et al., 1992; Cortes & Vapnik, 1995), in 1963, the support vector machine (SVM) perform a nonlinear mapping on the database in a space of high dimension called feature space. So the algorithm builds a linear decision surface, called hyperplane, to separate distinct classes (Cortes & Vapnik, 1995). SVMs have been widely used  
350 in several medical applications, e.g. breast cancer diagnosis over breast thermog-

raphy (de Vasconcelos et al., 2018; Pereira et al., 2020b; Santana et al., 2020) and mammography images (de Lima et al., 2016; Lima et al., 2015; de Lima et al., 2014; Silva et al., 2020; Cordeiro et al., 2017, 2016; de Lima et al., 2014; Cruz et al., 2018).

355 Thus, the training process of a support vector machine aims to find the hyperplane equation which maximizes the distance between it and the nearest data point. That hyperplane is called optimal hyperplane (Haykin, 2001). This machine uses support vector learning, which is a subset of the training data. SVM algorithm is well known for its ability to provide good generaliza-  
360 tion performance (Haykin, 2001). However, this performance may decrease by increasing the complexity of the hyperplane. The type of the machine varies with the type of kernel used to build the optimal hyperplane. Table 1 shows the kernel functions used in the present study.

| Type of SVM                 | Kernel function                                                                                         |
|-----------------------------|---------------------------------------------------------------------------------------------------------|
| Polynomial                  | $K(\mathbf{x}, \mathbf{y}) = (\mathbf{x} \bullet \mathbf{y} + 1)^E$                                     |
| Radial Basis Function (RBF) | $K(\mathbf{x}, \mathbf{y}) = \exp(-\gamma (\mathbf{x} - \mathbf{y}) \bullet (\mathbf{x} - \mathbf{y}))$ |

Table 1: Kernel functions of SVM

### 3.5.3. Decision Trees

365 Decision trees are a type of supervised machine learning model. They can be used in classification and regression problems. In most cases, trees have nodes responsible to store information. Essentially, in a tree there are four types of nodes: root, leaf, parent and child. The starting point is the Root node that has the highest hierarchical level. One node may connect to another, establishing  
370 a parent-child relationship, in which a parent node generate a child node. The terminal nodes is composed by Leaf nodes. Thus they have no children, and represent a decision. In this fashion, using such trees, the algorithm makes a decision after following a path that starts from the root node and reaches a leaf node. There are several types of decision trees. They usually differ from the  
375 way the method goes through the tree structure. Random Tree and Random

Forest methods are the most main ones.

According to Geurts et al. (2006) Random Tree algorithm uses a tree built by a stochastic process. This method considers only a few randomly selected features in each node of the tree.

380 In the other hand, Random Forest algorithm, consists in a collection of trees. These trees hierarchically divide the data, in other that, each tree votes for a class of the problem. At the end, the algorithm choose the most voted class as the prediction of the classifier Breiman (2001).

#### 3.5.4. *Bayesian Network and Naive Bayes*

385 Bayes Net and Naive Bayes are classifiers based on Bayes' Decision Theory. They are also called the test procedure by the Bayes hypothesis. Bayesian classifiers seek to find a minimum mean risk. By considering a set of correct decisions and a set of incorrect decisions, they use conditional probability to create the data model. The product of the frequency of each decision with  
390 the cost involved in making the decision results in the weights (Haykin, 2001). Bayesian networks behave like a linear classifier for a Gaussian distribution. Its behavior is comparable to that of a single layer perceptron.

In the standard Bayes Network algorithm, it assesses the probability of occurrence of a class from the values given by the others. Thus, this method  
395 assumes dependence between the features. Naive Bayes, in turn, considers that all features are independent of each other, being only connected to the class (Cheng & Greiner, 2001). This method does not allow dependency between features. Considering this assumption represents an unrealistic condition, the algorithm is considered "naive".

#### 400 3.6. *Parameters settings of the classifiers*

The experiments were made by using the following techniques: SVM with polynomial kernel of degree ( $E$ ) 1, 2, and 3 and RBF kernel with  $\gamma$  of 0.01; MLP with 50 and 100 neurons in hidden layer; Random Forest with 10, 20, 30, ..., 100 trees; Random Tree; Naive Bayes; Bayesian Network. As a evaluate



405 method we choose to perform a 10-fold cross validation and each configuration was executed 25 times.

### 3.7. Metrics

We chose six metrics to evaluate the performance of diagnostic tests: accuracy, precision, sensitivity, specificity, recall, and precision. Accuracy is the probability that the test will provide correct results, that is, be positive in sick patients and negative in healthy patients. In other words, it is the probability of the true positives and true negatives among all the results. The recall and sensitivity metrics can be calculated mathematically in the same way. They are the rate of true positives, and indicate the classifier ability to detect correctly people with Covid-19. However, they are commonly used in different contexts. In machine learning context, the term Recall is common. However, in the medical world, the use of the sensitivity metric is more frequent. Precision, on the other hand, is the fraction of the positive predictions that are actually positive. Specificity is the capacity of classifying healthy patients as negatives. It is the rate of true negatives. Finally, the Kappa index is a very good measure that can handle very well both multi-class and imbalanced class problems, as the one proposed here. These six metrics allow to discriminate between the target condition and health, in addition to quantifying the diagnostic exactitude (Borges, 2016). They can be calculated according to the equations in Table 2.

425 In Table 2, TP is the true positives, TN is the true negatives, FP is the false positives, and FN the false negatives,  $\rho_o$  is observed agreement, or accuracy, and  $\rho_e$  is the expected agreement, defined as following:

$$\rho_e = \frac{(TP + FP)(TP + FN) + (FN + TN)(FP + TN)}{(TP + FP + FN + TN)^2}. \quad (1)$$

## 4. Results

### 4.1. Feature Selection

430 During the features selection procedure, we first performed selections based on PSO and ES algorithms. The features selected by both methods resulted

| Metrics                | Equation                                       |
|------------------------|------------------------------------------------|
| Accuracy               | $Accuracy = \frac{TP + TN}{TP + TN + FP + FN}$ |
| Sensitivity and Recall | $Sensitivity = Recall = \frac{TP}{TP + FN}$    |
| Precision              | $Precision = \frac{TP}{TP + FP}$               |
| Specificity            | $Specificity = \frac{TN}{TN + FP}$             |
| Kappa index            | $k = \frac{\rho_o - \rho_e}{1 - \rho_e}$       |

Table 2: Metrics used to evaluate classifiers performance: overall accuracy, sensitivity (recall), precision, specificity, and kappa index

in equivalent classification performances, as described in Table 3. Considering the values of mean and standard deviation of the six metrics, the two methods presented similar performance: Mean accuracy of 99.0865, mean kappa index  
435 of 0.9817, sensitivity of 0.9938, mean precision of 0.9880, and mean specificity of 0.9880. In addition, most selected exams were the same. Thus, we chose to select manually the cheaper exams from the ones selected by PSO algorithm. Figure 3 details the list of exams for each situation. In the first list of Figure 3 (in blue) are all 108 exams from the original database. The second (in green)  
440 shows the 63 most relevant exams selected by PSO algorithm. In the third list, we present the final set of 24 exams.

#### 4.2. Classification

This section presents the results obtained in the classification phase. Tables 4 and 5 show the results of mean and standard deviation for all studied classifiers.  
445 Table 4 presents the results for the database with the complete set of exams. Table 5 shows the results for the reduced database, with 24 cheaper exams.

Figures 4 and 5 show the performance of the different methods for diagnosing SARS-Cov2 using only the 24 cheapest exams. Figure 4 presents the results of accuracy of these methods, while Figure 5 shows the results of kappa index.  
450 Both graphs contain statistical information from the 25 repetitions performed

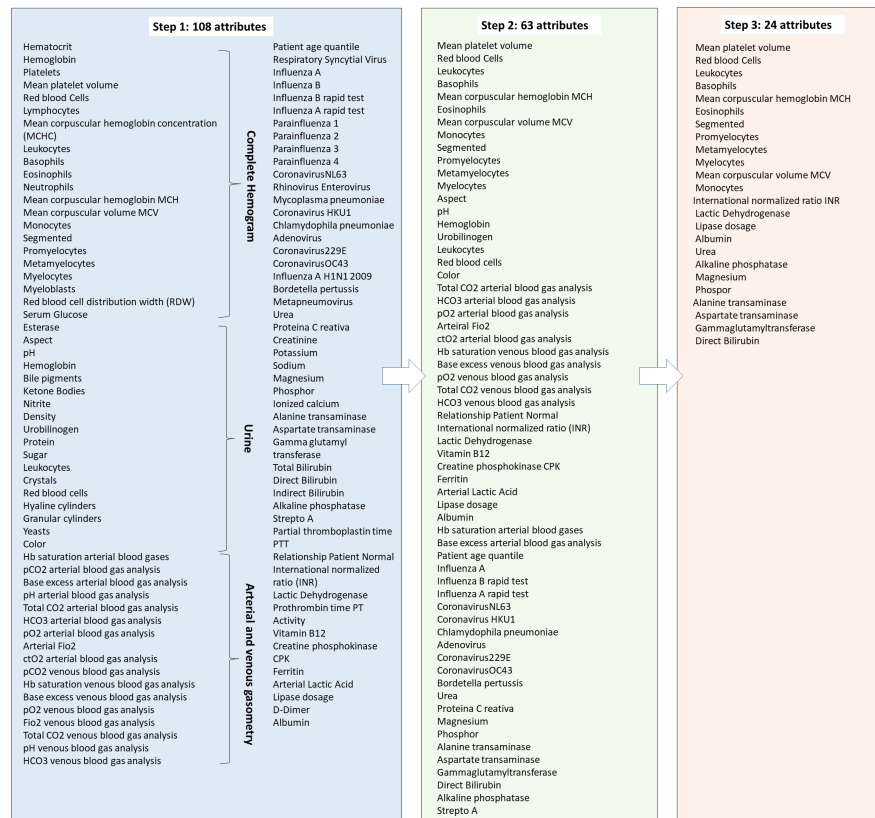

Figure 3: Description of the attributes in each of the bases used. Initially, the original database had 108 exams or attributes. After applying the PSO method for extracting attributes, a second base was formed with 63 attributes. Finally, 24 exams were selected manually

for each configuration. As previously mentioned, 10 folds cross-validation was used in all tests.

From the results in Figures 4 and 5 it is possible to see that Bayes Net method overcame the others. Therefore, in Table 3, we compare the results of this method to the complete database and the two databases with reduced amount of exams.

455

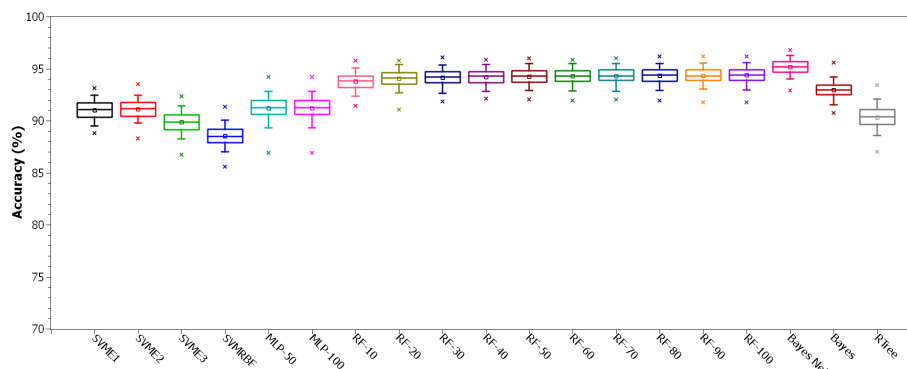

Figure 4: Comparison of Accuracy between configurations for Cheap Exams database.

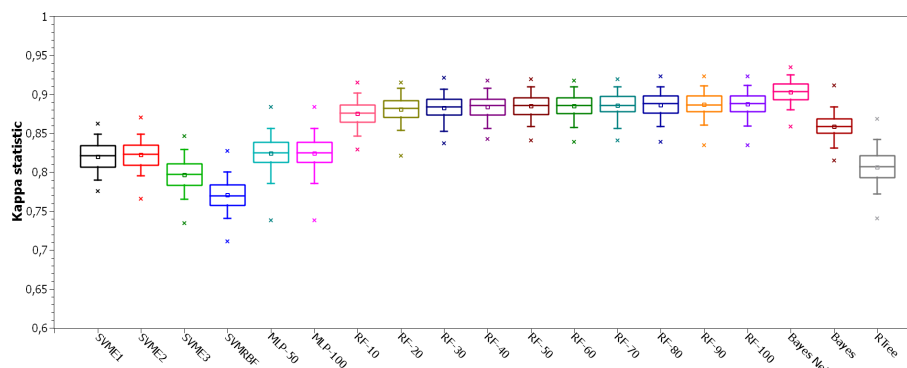

Figure 5: Comparison of Kappa statistic between configurations for Cheap Exams database.

### 4.3. HegIA Desktop Application

The prototype of the developed system is fully functional in a desktop version. It works like this: The health professional will be able to type the test results in the application. In this first version of the system, the exams must be entered in the unit indicated on the screens. Figures 6 and 7 show the list of exams with their respective fields. Figure 6 shows general exams, while Figure 7 exams belonging to the blood count. After completing the exams, the professional can select the "predict" option. Although the system works more efficiently with all fields filled in, it will also provide prediction with missing

| Database                            | Accuracy (%) |        | Kappa statistic |        | Recall/Sensitivity |        | Precision |        | Specificity |        |
|-------------------------------------|--------------|--------|-----------------|--------|--------------------|--------|-----------|--------|-------------|--------|
|                                     | Average      | StdDev | Average         | StdDev | Average            | StdDev | Average   | StdDev | Average     | StdDev |
| All Exams (Original Database)       | 99.0908      | 0.2809 | 0.9818          | 0.0056 | 0.9937             | 0.0032 | 0.9882    | 0.0049 | 0.9881      | 0.0050 |
| Database with ES feature selection  | 99.0865      | 0.2840 | 0.9817          | 0.0057 | 0.9938             | 0.0031 | 0.9880    | 0.0050 | 0.9880      | 0.0051 |
| Database with PSO feature selection | 99.0865      | 0.2840 | 0.9817          | 0.0057 | 0.9938             | 0.0031 | 0.9880    | 0.0050 | 0.9880      | 0.0051 |
| Cheap Exams (24 exams)              | 95.1589      | 0.6932 | 0.9032          | 0.0139 | 0.9676             | 0.0075 | 0.9377    | 0.0104 | 0.9356      | 0.0114 |

Table 3: Comparison of classification performance using Bayes Net among the three databases: With all 107 attributes (original database), with attribute extraction using PSO, and with the 24 cheap exams. The results show that the metrics had a minimal reduction with the decrease of the attributes.

exams. Finally, it is possible to view the screen in Figure 8, where the positive or negative diagnosis for Covid-19 is presented. In addition to the diagnosis, the screen presents the values of the main classification metrics, helping the professional in his decision making. On the screen it is also possible to view  
470 results to predict hospitalization. This information is nearing completion, and the full system will be presented in a near future.

Knowing that the classification method was trained with normalized database. Our desktop application rescales the data to fit with this data. The rescaling is made considering the reference values of each exams. So we could estimate  
475 each new value according the normalization.

The code for this desktop version is freely available for non-commercial purpose on Github repository: [github.com/Biomedical-Computing-UFPE/Heg-IA-Desktop](https://github.com/Biomedical-Computing-UFPE/Heg-IA-Desktop).

## 5. Discussion

480 The initial list of blood tests is quite extensive. In the context of researching a new disease, broader investigation is always needed. Thus, it is possible to verify the presence of other factors that may worsen the patient's health status. Examples of this are altered glycemic indexes, chronic obstructive pulmonary diseases, systemic arterial hypertension, as well as infections by other groups  
485 of viruses. This investigation also makes it possible to assess the course of the disease in different groups of individuals. Despite the great relevance of this search, a group of 107 clinical examinations is very large in the context of a

| Classifier                               |         | SARS-Cov2 (All exams) |               |              |              |
|------------------------------------------|---------|-----------------------|---------------|--------------|--------------|
|                                          |         | Kappa                 | Accuracy      | Recall       | Precision    |
| SVM Kernel<br>Polynomial E1              | Mean    | 0.930                 | 96.460        | 0.960        | 0.960        |
|                                          | Std Dev | 0.010                 | 0.570         | 0.010        | 0.010        |
| SVM Kernel<br>Polynomial E2              | Mean    | 0.930                 | 96.330        | 0.960        | 0.960        |
|                                          | Std Dev | 0.010                 | 0.580         | 0.010        | 0.010        |
| SVM Kernel<br>Polynomial E3              | Mean    | 0.920                 | 96.080        | 0.960        | 0.960        |
|                                          | Std Dev | 0.010                 | 0.580         | 0.010        | 0.010        |
| SVM Kernel RBF                           | Mean    | 0.910                 | 95.630        | 0.960        | 0.960        |
|                                          | Std Dev | 0.010                 | 0.620         | 0.010        | 0.010        |
| MLP (50 neurons in<br>the hidden layer)  | Mean    | 0.900                 | 95.060        | 0.950        | 0.950        |
|                                          | Std Dev | 0.020                 | 0.840         | 0.010        | 0.010        |
| MLP (100 neurons in<br>the hidden layer) | Mean    | 0.900                 | 95.060        | 0.950        | 0.950        |
|                                          | Std Dev | 0.020                 | 0.840         | 0.010        | 0.010        |
| Random Forest (10<br>iterations)         | Mean    | 0.950                 | 97.350        | 0.970        | 0.970        |
|                                          | Std Dev | 0.010                 | 0.500         | 0.010        | 0.000        |
| Random Forest (20<br>iterations)         | Mean    | 0.960                 | 97.900        | 0.980        | 0.980        |
|                                          | Std Dev | 0.010                 | 0.430         | 0.000        | 0.000        |
| Random Forest (30<br>iterations)         | Mean    | 0.960                 | 98.060        | 0.980        | 0.980        |
|                                          | Std Dev | 0.010                 | 0.420         | 0.000        | 0.000        |
| Random Forest (40<br>iterations)         | Mean    | 0.960                 | 98.130        | 0.980        | 0.980        |
|                                          | Std Dev | 0.010                 | 0.430         | 0.000        | 0.000        |
| Random Forest (50<br>iterations)         | Mean    | 0.960                 | 98.160        | 0.980        | 0.980        |
|                                          | Std Dev | 0.010                 | 0.430         | 0.000        | 0.000        |
| Random Forest (60<br>iterations)         | Mean    | 0.960                 | 98.190        | 0.980        | 0.980        |
|                                          | Std Dev | 0.010                 | 0.430         | 0.000        | 0.000        |
| Random Forest (70<br>iterations)         | Mean    | 0.960                 | 98.200        | 0.980        | 0.980        |
|                                          | Std Dev | 0.010                 | 0.440         | 0.000        | 0.000        |
| Random Forest (80<br>iterations)         | Mean    | 0.960                 | 98.220        | 0.980        | 0.980        |
|                                          | Std Dev | 0.010                 | 0.440         | 0.000        | 0.000        |
| Random Forest (90<br>iterations)         | Mean    | 0.960                 | 98.230        | 0.980        | 0.980        |
|                                          | Std Dev | 0.010                 | 0.440         | 0.000        | 0.000        |
| Random Forest (100<br>iterations)        | Mean    | 0.960                 | 98.240        | 0.980        | 0.980        |
|                                          | Std Dev | 0.010                 | 0.450         | 0.000        | 0.000        |
| Bayesian Network                         | Mean    | <b>0.980</b>          | <b>99.090</b> | <b>0.990</b> | <b>0.990</b> |
|                                          | Std Dev | <b>0.010</b>          | <b>0.270</b>  | <b>0.000</b> | <b>0.000</b> |
| Naïve Naves                              | Mean    | 0.950                 | 97.420        | 0.970        | 0.980        |
|                                          | Std Dev | 0.010                 | 0.470         | 0.000        | 0.000        |
| Random Tree                              | Mean    | 0.840                 | 91.800        | 0.920        | 0.920        |
|                                          | Std Dev | 0.030                 | 1.600         | 0.020        | 0.020        |

Table 4: Results of experiments with multiple classifiers using the original database (All exams).

pandemic. They could lead to long periods of analysis. This highlights the need to apply methods to select the most important attributes.

490 In this way, during the feature selection phase our method was able to reduce

| Classifier                               |         | SARS-Cov2 with Cheap Exams (24 selected) |               |              |              |
|------------------------------------------|---------|------------------------------------------|---------------|--------------|--------------|
|                                          |         | Kappa                                    | Accuracy      | Recall       | Precision    |
| SVM Kernel<br>Polynomial E1              | Mean    | 0.820                                    | 91.010        | 0.960        | 0.870        |
|                                          | Std Dev | 0.020                                    | 0.920         | 0.010        | 0.010        |
| SVM Kernel<br>Polynomial E2              | Mean    | 0.820                                    | 91.120        | 0.970        | 0.870        |
|                                          | Std Dev | 0.020                                    | 0.870         | 0.010        | 0.010        |
| SVM Kernel<br>Polynomial E3              | Mean    | 0.800                                    | 89.840        | 0.970        | 0.850        |
|                                          | Std Dev | 0.020                                    | 0.960         | 0.010        | 0.010        |
| SVM Kernel RBF                           | Mean    | 0.770                                    | 88.530        | 0.960        | 0.840        |
|                                          | Std Dev | 0.020                                    | 0.950         | 0.010        | 0.010        |
| MLP (50 neurons in<br>the hidden layer)  | Mean    | 0.820                                    | 91.200        | 0.940        | 0.890        |
|                                          | Std Dev | 0.020                                    | 1.050         | 0.020        | 0.020        |
| MLP (100 neurons in<br>the hidden layer) | Mean    | 0.820                                    | 91.200        | 0.940        | 0.890        |
|                                          | Std Dev | 0.020                                    | 1.050         | 0.020        | 0.020        |
| Random Forest (10<br>iterations)         | Mean    | 0.880                                    | 93.770        | 0.970        | 0.910        |
|                                          | Std Dev | 0.020                                    | 0.820         | 0.010        | 0.010        |
| Random Forest (20<br>iterations)         | Mean    | 0.880                                    | 94.040        | 0.970        | 0.910        |
|                                          | Std Dev | 0.020                                    | 0.820         | 0.010        | 0.010        |
| Random Forest (30<br>iterations)         | Mean    | 0.880                                    | 94.130        | 0.980        | 0.910        |
|                                          | Std Dev | 0.020                                    | 0.800         | 0.010        | 0.010        |
| Random Forest (40<br>iterations)         | Mean    | 0.880                                    | 94.200        | 0.980        | 0.910        |
|                                          | Std Dev | 0.020                                    | 0.780         | 0.010        | 0.010        |
| Random Forest (50<br>iterations)         | Mean    | 0.880                                    | 94.250        | 0.980        | 0.910        |
|                                          | Std Dev | 0.020                                    | 0.770         | 0.010        | 0.010        |
| Random Forest (60<br>iterations)         | Mean    | 0.880                                    | 94.270        | 0.980        | 0.910        |
|                                          | Std Dev | 0.020                                    | 0.790         | 0.010        | 0.010        |
| Random Forest (70<br>iterations)         | Mean    | 0.880                                    | 94.290        | 0.980        | 0.920        |
|                                          | Std Dev | 0.020                                    | 0.780         | 0.010        | 0.010        |
| Random Forest (80<br>iterations)         | Mean    | 0.890                                    | 94.320        | 0.980        | 0.920        |
|                                          | Std Dev | 0.020                                    | 0.790         | 0.010        | 0.010        |
| Random Forest (90<br>iterations)         | Mean    | 0.890                                    | 94.350        | 0.980        | 0.920        |
|                                          | Std Dev | 0.020                                    | 0.800         | 0.010        | 0.010        |
| Random Forest (100<br>iterations)        | Mean    | 0.890                                    | 94.370        | 0.980        | 0.920        |
|                                          | Std Dev | 0.020                                    | 0.790         | 0.010        | 0.010        |
| Bayesian Network                         | Mean    | <b>0.900</b>                             | <b>95.160</b> | 0.970        | <b>0.940</b> |
|                                          | Std Dev | <b>0.010</b>                             | <b>0.690</b>  | 0.010        | <b>0.010</b> |
| Naïve Naves                              | Mean    | 0.860                                    | 92.940        | <b>1.000</b> | 0.880        |
|                                          | Std Dev | 0.020                                    | 0.810         | <b>0.000</b> | 0.010        |
| Random Tree                              | Mean    | 0.810                                    | 90.330        | 0.900        | 0.900        |
|                                          | Std Dev | 0.020                                    | 1.060         | 0.020        | 0.010        |

Table 5: Results of experiments with multiple classifiers using the database with 24 attributes (Cheap exams).

the amount of features (exams) in more than 20%. This was an important achievement, since it reduces the amount of required procedures. Therefore resulting in less expensive and less time-consuming diagnostic process.

The screenshot shows a desktop application window titled "Heg.IA: Support diagnosis of Covid-19 and hospitalization prediction". The window has a menu bar with "File", "Predict", and "About". Below the menu bar, there are two tabs: "General exams" and "Complete Hemogram". The "Complete Hemogram" tab is active, displaying a grid of 12 input fields for laboratory tests. The tests and their units are: Urea (mg/dL), Albumin (g/dL), Phosphor (mg/dL), Magnesium (mg/dL), Alanine transaminase (U/L), Aspartate transaminase (U/L), Gamma glutamyl transferase (U/L), Direct Bilirubin (mg/dL), Alkaline phosphatase (U/L), INR - International Normalized Ratio (s), Lactic Dehydrogenase (U/L), and Lipase dosage (U/L). At the bottom of the window, there are two buttons: "Predict" and "Close".

Figure 6: Screen 1 of the HegIA desktop application. General blood tests should be entered using the indicated units.

For the classification stage, Figures 4 and 5 show that, overall, Bayes Net  
495 method overcame the others in accuracy, which was greater than 95%, and in  
kappa statistic, reaching more than 0.90. All tested configurations of Random  
Forest also showed good performance, with accuracies around 95% and kappa  
close to 0.90. Naive Bayes algorithm performed slightly worse than these others,  
but still achieving great results for both accuracy and kappa. SVM, MLP and  
500 Random Tree classifiers, on the other hand, achieved less impressive results,  
with accuracies around 90% and kappa between 0.75 and 0.85. As for the data  
dispersion, it was slightly greater for kappa results, when compared to accuracy.  
However, both graphs show low dispersion, indicating good reliability of the  
system.

505 The superior results of the Bayes network may indicate or confirm the fea-  
tures (exams) are statistically independent or, at least, preserve a low level of



The screenshot shows a desktop application window titled "Heg.IA: Support diagnosis of Covid-19 and hospitalization prediction". The window has a menu bar with "File", "Predict", and "About". Below the menu bar, there are two tabs: "General exams" and "Complete Hemogram". The "Complete Hemogram" tab is active, displaying a form with 14 input fields arranged in two columns. The left column contains: "Mean platelet volume (uL)", "Red blood cells (million/uL)", "Leukocytes (/uL)", "Eosinophils (/uL)", "Basophils (/uL)", and "Mean corpuscular hemoglobin MCH (pg)". The right column contains: "Mean corpuscular hemoglobin MCV (fL)", "Segmented (/uL)", "Monocytes (/uL)", "Promyelocytes (%)", "Metamyelocytes (%)", and "Myelocytes (/mm3)". At the bottom of the window, there are two buttons: "Predict" and "Close".

Figure 7: Screen 2 of the HegIA desktop application. Blood tests from complete hemogram should be inserted using the indicated units.

interdependence. Therefore, even though all 24 selected exams showed to be relevant to diagnose SARS-Cov2, our hypothesis is that they could exhibit some degree of independence from each other.

510 The results presented in Table 3 show the classification performance using Bayes Net among the three databases: with the complete set of exams (original database), with features selected by PSO and the one including just the cheaper exams. The table shows the average and standard deviation values for all six metrics: accuracy, kappa statistic, recall, sensibility, precision and specificity.

515 By comparing the results of all databases, we observed a minimal reduction in accuracy, recall and sensitivity with the decrease of the amount of features. All these metrics showed a decrease lower than 4%, when using only the cheap exams. For precision and specificity, the reduction for 24 exams led to a decrease of around 5%. The selection of these exams triggered a reduction of 8% in kappa

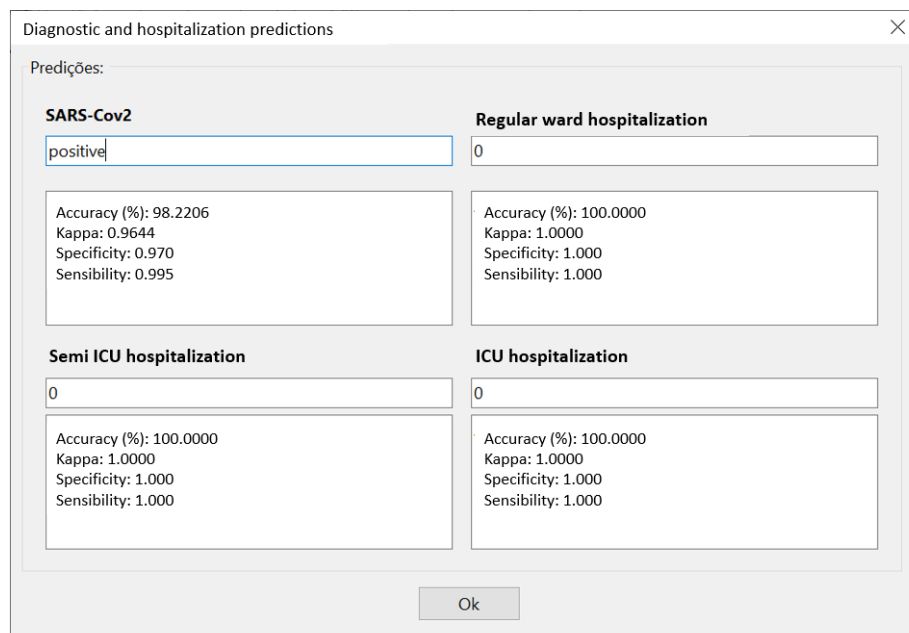

Figure 8: Covid-19 diagnostic prediction results screen from the HegIA desktop application.

520 statistic.

Thus, the 24 selected tests have been shown to be efficient in the diagnosis of Covid-19 in a fast way. Several studies have analyzed the clinical potential of these hematological parameters. Lippi & Plebani (2020) points out that many patients with Covid-19 do not have abnormal coagulation tests at the time of admission to the hospital. However, there is a gradual increase as the severity of the disease increases. Wan et al. (2020) also detected cases of hypercoagulable state and secondary hyperfibrinolysis. These findings confirm that parameters such as the mean volume of platelets are important in identifying severe cases and predicting the risk of mortality (Tang et al., 2020a; Lippi et al., 2020).

530 Lippi & Plebani (2020) also summarized the main contributions of laboratory tests to Covid-19. Among them are those of albumin, aspartate transaminase, alanine transaminase, bilirubin, lactate dehydrogenase and leukocytes. These same exams were selected by the methods in our work, confirming the relevance

of the results obtained. The study of Huang et al. (2020) also showed cases  
535 of leukopenia and lymphopenia. This may indicate a decreased immunological  
response to the virus. On the other hand, the potential clinical significance of  
the increased value of aminotransferases and bilirubin aligned with low albumin  
values is a liver injury. Wan et al. (2020) suggest that these changes in the  
severe patients were more obvious. Liver damage might be directly caused by  
540 the viral infection of liver cells (Zhang et al., 2020a). High levels of lactate  
dehydrogenase can be related to pulmonary injury and/or widespread organ  
damage (Lippi & Plebani, 2020). In addition, Lippi & Plebani (2020) believes  
that increased monocytes levels can show a severe viral infection.

These results support the idea that Covid-19 can causes damages beyond  
545 hematological and respiratory issues. Examples are multi-organ failure (MOF)  
and its complications, and intravascular coagulopathy (Lippi et al., 2020). These  
results highlight the importance of diagnosis based on clinical examinations.

## 6. Conclusion

A new kind of coronavirus, SARS-Cov2, started the biggest pandemic of the  
550 century. This virus has a stronger human-to-human transmission capacity, and  
has already led to millions of infected people and thousands of deaths. One of  
the main strategies to fight the pandemic is testing in a precise and quick way  
(WHO, 2020).

The ground-truth test in Covid-19 diagnosis is the Reverse Transcription  
555 Polymerase Chain Reaction (RT-PCR) with DNA sequencing and identifica-  
tion. RT-PCR is precise, but takes several hours to be assessed. Another type  
of test, based on IgM/IgG antibodies, delivers results quickly, however they  
are nonspecific for Covid-19, and may have very low sensitivity and specificity.  
IgM/IgG tests do not directly detect the SARS-Cov2 presence, indeed they  
560 detect the serological evidence of recent infection.

Considering this, the development of a diagnosis support system to provide  
fast results with high sensitivity and specificity is necessary and urgent. In

this context, blood tests have some advantages. First, they are commonly used during medical screening. Besides that blood tests are less expensive and less  
565 time-consuming than other diagnosis methods. Thus providing a more accessible system. By combining these blood tests results to analysis based on Artificial Intelligence, we were able to provide a robust, efficient and easily available system to diagnose Covid-19.

We optimized the system by reducing the amount of required exams, based  
570 on their relevance to describe the diagnosis problem and on their price and availability worldwide, specially in low-income communities. Firstly we performed an automatic exam selection using Particle Swarm Optimization (PSO) method. Then, we manually chose some exams aiming to reach an optimal combination of price, time and number of procedures. This procedure resulted in 24 blood  
575 tests, which can be delivered in up to one hour. Since the computational classification can be performed in milliseconds, with the 24 blood tests results, a technician can get diagnostic results relatively fast. The user just have to fill in the electronic form with these 24 blood tests results.

By using a computationally simple method, based on the classical Bayesian  
580 networks, we were able to achieve high diagnosis performance:  $95.159\% \pm 0.693$  of overall accuracy, kappa index of  $0.903 \pm 0.014$ , sensitivity of  $0.968 \pm 0.007$ , precision of  $0.938 \pm 0.010$  and specificity of  $0.936 \pm 0.011$ . If compared to deep-learning based methods, the proposed system also reduces computational cost.

More importantly, our approach provides a possible way out for the tests  
585 availability issue in the context of Covid-19. The availability of this software system combined to low cost and fast tests, based on blood analysis, may be of great help to overcome the testing challenges being experienced worldwide. Less-favored countries and communities can especially benefit from this solution. With this system we may be able to expand access to effective testing and  
590 thereby reach and save more people.

## Acknowledgements

The authors are grateful to the Brazilian research agencies CAPES and CNPq, for the partial financial support of this research.

## Conflict of Interest

595 All authors declare they have no conflicts of interest.

## Compliance with Ethical Standards

This study was funded by the Brazilian research agencies CAPES and CNPq.

All procedures performed in studies involving human participants were in accordance with the ethical standards of the institutional and/or national research  
600 committee and with the 1964 Helsinki declaration and its later amendments or comparable ethical standards.

## References

- Barbosa, V. A. F., Santana, M. A., Andrade, M. K. S., Lima, R. C. F., & Santos, W. P. (2020). Deep-wavelet neural networks for breast cancer early diagnosis  
605 using mammary thermographies. In H. Das, C. Pradhan, & N. Dey (Eds.), *Deep Learning for Data Analytics: Foundations, Biomedical Applications, and Challenges*. London: Academic Press. (1st ed.).
- Beeching, N. J., Fletcher, T. E., & Beadsworth, M. B. J. (2020). Covid-19: testing times. *BMJ*, *369*. URL: <https://www.bmj.com/content/369/bmj.m1403>. doi:10.1136/bmj.m1403.  
610 arXiv:<https://www.bmj.com/content/369/bmj.m1403.full.pdf>.
- Blagus, R., & Lusa, L. (2013). Smote for high-dimensional class-imbalanced data. *BMC Bioinformatics*, *14*, 106.
- Borges, L. (2016). Medidas de acurácia diagnóstica na pesquisa cardiovascular.  
615 *International Journal of Cardiovascular Sciences*, *29*, 218–22.

- Boser, B. E., Guyon, I. M., & Vapnik, V. N. (1992). A training algorithm for optimal margin classifiers. In *Proceedings of the fifth annual workshop on Computational learning theory* (pp. 144–52).
- Breiman, L. (2001). Random forests. *Machine Learning*, 45, 5–32.
- 620 Burog, A. I. L. D., Yacapin, C. P. R. C., Maglente, R. R. O., Macalalad-Josue, A. A., & Uy, E. J. B. (2020). Should IgM/IgG rapid test kit be used in the diagnosis of COVID-19? *Asia Pacific Center for Evidence Based Healthcare*, 2020, 1–12.
- Cheng, J., & Greiner, R. (2001). Learning Bayesian belief network classifiers: 625 Algorithms and System. *Advances in Artificial Intelligence*, 2056, 141–51.
- Commowick, O., Istace, A., Kain, M., Laurent, B., Leray, F., Simon, M., Pop, S. C., Girard, P., Ameli, R., Ferré, J.-C. et al. (2018). Objective evaluation of multiple sclerosis lesion segmentation using a data management and processing infrastructure. *Scientific reports*, 8, 1–17.
- 630 Cordeiro, F. R., Santos, W. P., & Silva-Filho, A. G. (2016). A semi-supervised fuzzy growcut algorithm to segment and classify regions of interest of mammographic images. *Expert Systems with Applications*, 65, 116–26.
- Cordeiro, F. R., Santos, W. P. d., & Silva-Filho, A. G. (2017). Analysis of supervised and semi-supervised growcut applied to segmentation of masses in 635 mammography images. *Computer Methods in Biomechanics and Biomedical Engineering: Imaging & Visualization*, 5, 297–315.
- Cortes, C., & Vapnik, V. (1995). Support-vector networks. *Machine learning*, 20, 273–97.
- Cruz, T., Cruz, T., & Santos, W. (2018). Detection and classification of lesions 640 in mammographies using neural networks and morphological wavelets. *IEEE Latin America Transactions*, 16, 926–32.

- Döhla, M., Boesecke, C., Schulte, B., Diegmann, C., Sib, E., Richter, E., Eschbach-Bludau, M., Aldabbagh, S., Marx, B., Eis-Hübinger, A.-M. et al. (2020). Rapid point-of-care testing for SARS-CoV-2 in a community screening  
645 setting shows low sensitivity. *Public Health*, 182, 170–2.
- Egner, W., Beck, D. C. C., Davis, G., Dayan, C., El-shanawany, T., Griffiths, E., Kumararatne, D., Sandle, L., Sargur, R., Savić, S. et al. (2020). Statement from RCPATH’s immunology specialty advisory committee on COVID-19/SARS CoV2 antibody evaluation. *Pathology: The science behind the cure*,  
650 2020.
- Fan, B. E., Chong, V. C. L., Chan, S. S. W., Lim, G. H., Lim, K. G. E., Tan, G. B., Mucheli, S. S., Kuperan, P., & Ong, K. H. (2020). Hematologic parameters in patients with COVID-19 infection. *American Journal of Hematology*, 2020.
- 655 Gao, Y., Li, T., Han, M., Li, X., Wu, D., Xu, Y., Zhu, Y., Liu, Y., Wang, X., & Wang, L. (2020). Diagnostic utility of clinical laboratory data determinations for patients with the severe COVID-19. *Journal of Medical Virology*, .
- Geurts, P., Ernst, D., & Wehenkel, L. (2006). Extremely randomized trees. *Machine Learning*, 63, 3–42.
- 660 Gunčar, G., Kukar, M., Notar, M., Brvar, M., Černelč, P., Notar, M., & Notar, M. (2018). An application of machine learning to haematological diagnosis. *Scientific Reports*, 8, 1–12.
- Guo, L., Ren, L., Yang, S., Xiao, M., Chang, D., Yang, F., Dela Cruz, C. S., Wang, Y., Wu, C., Xiao, Y., Zhang, L., Han, L., Dang, S., Xu, Y., Yang, Q.-W., Xu, S.-Y., Zhu, H.-D., Xu, Y.-C., Jin, Q., Sharma, L., Wang, L.,  
665 & Wang, J. (2020a). Profiling Early Humoral Response to Diagnose Novel Coronavirus Disease (COVID-19). *Clinical Infectious Diseases*, 2020.
- Guo, Y.-R., Cao, Q.-D., Hong, Z.-S., Tan, Y.-Y., Chen, S.-D., Jin, H.-J., Tan, K.-S., Wang, D.-Y., & Yan, Y. (2020b). The origin, transmission and clinical

- 670 therapies on coronavirus disease 2019 (COVID-19) outbreak – an update on  
the status. *Military Medical Research*, 7, 1–10.
- Haykin, S. (2001). Neural networks: principles and practice. *Bookman*, 11, 900.
- Hoffman, T., Nissen, K., Krambrich, J., Rönnerberg, B., Akaberi, D., Es-  
maeilzadeh, M., Salaneck, E., Lindahl, J., & Lundkvist, Å. (2020). Evaluation  
675 of a covid-19 igm and igg rapid test; an efficient tool for assessment of past  
exposure to sars-cov-2. *Infection Ecology & Epidemiology*, 10, 1754538.
- Huang, C., Wang, Y., Li, X., Ren, L., Zhao, J., Hu, Y., Zhang, L., Fan, G., Xu,  
J., Gu, X. et al. (2020). Clinical features of patients infected with 2019 novel  
coronavirus in Wuhan, China. *The Lancet*, 395, 497–506.
- 680 Kaggle (2020). *Diagnosis of COVID-19 and its clinical spectrum*. Kaggle. URL:  
[www.kaggle.com/einsteindata4u/covid19](http://www.kaggle.com/einsteindata4u/covid19) last accessed: 2020 Apr. 07.
- Kennedy, J., & Eberhart, R. (1995). Particle swarm optimization. In *Proceedings  
of ICNN'95-International Conference on Neural Networks* (pp. 1942–8). IEEE  
volume 4.
- 685 Kim, Y., Street, W. N., & Menczer, F. (2000). Feature selection in unsupervised  
learning via evolutionary search. In *Proceedings of the sixth ACM SIGKDD  
international conference on Knowledge discovery and data mining* (pp. 365–  
9).
- Lerner, B., Levinstein, M., Rosenberg, B., Guterman, H., Dinstein, L., &  
690 Romem, Y. (1994). Feature selection and chromosome classification using  
a multilayer perceptron neural network. In *Proceedings of 1994 IEEE In-  
ternational Conference on Neural Networks (ICNN'94)* (pp. 3540–5). IEEE  
volume 6.
- Li, Z., Yi, Y., Luo, X., Xiong, N., Liu, Y., Li, S., Sun, R., Wang, Y., Hu,  
695 B., Chen, W. et al. (2020). Development and clinical application of a rapid  
igm-igg combined antibody test for sars-cov-2 infection diagnosis. *Journal of  
medical virology*, .



- Liang, K.-H., Yao, X., & Newton, C. (2000). Evolutionary search of approximated n-dimensional landscapes. *International Journal of Knowledge Based Intelligent Engineering Systems*, 4, 172–83. 700
- Lima, S., Azevedo, W., Cordeiro, F., Silva-Filho, A., & Santos, W. (2015). Feature extraction employing fuzzy-morphological decomposition for detection and classification of mass on mammograms. In *Conference proceedings... Annual International Conference of the IEEE Engineering in Medicine and Biology Society. IEEE Engineering in Medicine and Biology Society. Annual Conference* (pp. 801–4). volume 2015. 705
- de Lima, S. M., da Silva-Filho, A. G., & dos Santos, W. P. (2014). A methodology for classification of lesions in mammographies using zernike moments, elm and svm neural networks in a multi-kernel approach. In *2014 IEEE International Conference on Systems, Man, and Cybernetics (SMC)* (pp. 988–91). IEEE. 710
- de Lima, S. M., da Silva-Filho, A. G., & dos Santos, W. P. (2016). Detection and classification of masses in mammographic images in a multi-kernel approach. *Computer Methods and Programs in Biomedicine*, 134, 11–29.
- Lin, D., Liu, L., Zhang, M., Hu, Y., Yang, Q., Guo, J., Dai, Y., Xu, Y., Cai, Y., Chen, X. et al. (2020). Evaluations of serological test in the diagnosis of 2019 novel coronavirus (SARS-CoV-2) infections during the COVID-19 outbreak. *medRxiv*, . 715
- Lippi, G., & Plebani, M. (2020). Laboratory abnormalities in patients with Covid-2019 infection. *Clinical Chemistry and Laboratory Medicine (CCLM)*, 1. 720
- Lippi, G., Plebani, M., & Henry, B. M. (2020). Thrombocytopenia is associated with severe coronavirus disease 2019 (COVID-19) infections: A meta-analysis. *Clinica Chimica Acta*, .

- 725 Liu, J., Li, S., Liu, J., Liang, B., Wang, X., Wang, H., Li, W., Tong, Q., Yi, J.,  
Zhao, L. et al. (2020a). Longitudinal characteristics of lymphocyte responses  
and cytokine profiles in the peripheral blood of SARS-CoV-2 infected patients.  
*EBioMedicine*, (p. 102763).
- Liu, Y., Liu, Y., Diao, B., Ren, F., Wang, Y., Ding, J., & Huang, Q. (2020b).  
730 Diagnostic indexes of a rapid igg/igm combined antibody test for sars-cov-2.  
*medRxiv*, .
- Luo, Y., Szolovits, P., Dighe, A. S., & Baron, J. M. (2016). Using machine learn-  
ing to predict laboratory test results. *American Journal of Clinical Pathology*,  
*145*, 778–88.
- 735 Okba, N. M., Muller, M. A., Li, W., Wang, C., GeurtsvanKessel, C. H., Corman,  
V. M., Lamers, M. M., Sikkema, R. S., de Bruin, E., Chandler, F. D. et al.  
(2020). Sars-cov-2 specific antibody responses in covid-19 patients. *medRxiv*,  
.
- Patel, R., Babady, E., Theel, E. S., Storch, G. A., Pinsky, B. A., George,  
740 K. S., Smith, T. C., & Bertuzzi, S. (2020). Report from the american society  
for microbiology covid-19 international summit, 23 march 2020: Value of  
diagnostic testing for sars-cov-2/covid-19.
- Pereira, J. M. S., Santana, M. A., Lima, R. C. F., Lima, S. M. L., & Santos,  
W. P. (2020a). Method for classification of breast lesions in thermographic  
745 images using elm classifiers. In W. P. dos Santos, M. A. de Santana, &  
W. W. A. da Silva (Eds.), *Understanding a Cancer Diagnosis* (pp. 117–32).  
New York: Nova Science. (1st ed.).
- Pereira, J. M. S., Santana, M. A., Lima, R. C. F., & Santos, W. P. (2020b).  
Lesion detection in breast thermography using machine learning algorithms  
750 without previous segmentation. In W. P. dos Santos, M. A. de Santana, &  
W. W. A. da Silva (Eds.), *Understanding a Cancer Diagnosis* (pp. 81–94).  
New York: Nova Science. (1st ed.).

- Pereira, J. M. S., Santana, M. A., Silva, W. W. A., Lima, R. C. F., Lima, S. M. L., & Santos, W. P. (2020c). Dialectical optimization method as a feature selection tool for breast cancer diagnosis using thermographic images. In W. P. dos Santos, M. A. de Santana, & W. W. A. da Silva (Eds.), *Understanding a Cancer Diagnosis* (pp. 95–118). New York: Nova Science. (1st ed.).
- 755
- Phung, S. L., Bouzerdoum, A., & Chai, D. (2005). Skin segmentation using color pixel classification: analysis and comparison. *IEEE transactions on pattern analysis and machine intelligence*, *27*, 148–54.
- 760
- Poli, R., Kennedy, J., & Blackwell, T. (2007). Particle swarm optimization. *Swarm intelligence*, *1*, 33–57.
- Rodrigues, A. L., de Santana, M. A., Azevedo, W. W., Bezerra, R. S., Barbosa, V. A., de Lima, R. C., & dos Santos, W. P. (2019). Identification of mammary lesions in thermographic images: feature selection study using genetic algorithms and particle swarm optimization. *Research on Biomedical Engineering*, *35*, 213–22.
- 765
- Rosenblatt, F. (1958). The perceptron: a probabilistic model for information storage and organization in the brain. *Psychological review*, *65*, 386.
- 770
- Santana, M. A., Pereira, J. M. S., Lima, R. C. F., & Santos, W. P. (2020). Breast lesions classification in frontal thermographic images using intelligent systems and moments of haralick and zernike. In W. P. dos Santos, M. A. de Santana, & W. W. A. da Silva (Eds.), *Understanding a Cancer Diagnosis* (pp. 65–80). New York: Nova Science. (1st ed.).
- 775
- Santana, M. A. d., Pereira, J. M. S., Silva, F. L. d., Lima, N. M. d., Sousa, F. N. d., Arruda, G. M. S. d., Lima, R. d. C. F. d., Silva, W. W. A. d., & Santos, W. P. d. (2018). Breast cancer diagnosis based on mammary thermography and extreme learning machines. *Research on Biomedical Engineering*, *34*, 45–53.

- 780 Silva, W. W. A., Santana, M. A., Silva Filho, A. G., Lima, S. M. L., & Santos, W. P. (2020). Morphological extreme learning machines applied to the detection and classification of mammary lesions. In T. K. Gandhi, S. Bhattacharyya, S. De, D. Konar, & S. Dey (Eds.), *Advanced Machine Vision Paradigms for Medical Image Analysis*. London: Elsevier.
- 785 Tan, L., Wang, Q., Zhang, D., Ding, J., Huang, Q., Tang, Y.-Q., Wang, Q., & Miao, H. (2020). Lymphopenia predicts disease severity of COVID-19: a descriptive and predictive study. *Signal Transduction and Targeted Therapy*, 5, 1–3.
- Tang, N., Li, D., Wang, X., & Sun, Z. (2020a). Abnormal coagulation parameters are associated with poor prognosis in patients with novel coronavirus pneumonia. *Journal of Thrombosis and Haemostasis*, .
- 790 Tang, Y.-W., Schmitz, J. E., Persing, D. H., & Stratton, C. W. (2020b). The laboratory diagnosis of covid-19 infection: Current issues and challenges. *Journal of Clinical Microbiology*, 2020.
- 795 Tanner, L., Schreiber, M., Low, J. G., Ong, A., Tolfvenstam, T., Lai, Y. L., Ng, L. C., Leo, Y. S., Puong, L. T., Vasudevan, S. G. et al. (2008). Decision tree algorithms predict the diagnosis and outcome of dengue fever in the early phase of illness. *PLoS Neglected Tropical Diseases*, 2.
- Turner, A. J., Hiscox, J. A., & Hooper, N. M. (2004). Ace2: from vasopeptidase  
800 to sars virus receptor. *Trends in pharmacological sciences*, 25, 291–4.
- de Vasconcelos, J., dos Santos, W., & de Lima, R. (2018). Analysis of methods of classification of breast thermographic images to determine their viability in the early breast cancer detection. *IEEE Latin America Transactions*, 16, 1631–7.
- 805 Wan, S., Xiang, Y., Fang, W., Zheng, Y., Li, B., Hu, Y., Lang, C., Huang, D., Sun, Q., Xiong, Y. et al. (2020). Clinical features and treatment of COVID-19 patients in northeast Chongqing. *Journal of Medical Virology*, .

- Wang, X., Yang, J., Teng, X., Xia, W., & Jensen, R. (2007). Feature selection based on rough sets and particle swarm optimization. *Pattern Recognition Letters*, *28*, 459–71. 810
- WHO (2020). *Coronavirus disease (COVID-19) pandemic*. World Health Organization. URL: [www.who.int/emergencies/diseases/novel-coronavirus-2019](http://www.who.int/emergencies/diseases/novel-coronavirus-2019) last accessed: 2020 apr. 02.
- Zhang, C., Shi, L., & Wang, F.-S. (2020a). Liver injury in Covid-19: management and challenges. *The Lancet Gastroenterology & Hepatology*, *5*, 428–30. 815
- Zhang, T., Wu, Q., & Zhang, Z. (2020b). Probable pangolin origin of SARS-CoV-2 associated with the COVID-19 outbreak. *Current Biology*, .
- Zheng, Y.-Y., Ma, Y.-T., Zhang, J.-Y., & Xie, X. (2020). COVID-19 and the cardiovascular system. *Nature Reviews Cardiology*, *17*, 259–60.
